# Supplementary material
Source: PubMed Central journal article supplement (PMC2715867)
Supplement: NIHMS103164-supplement-3.pdf [file NIHMS103164-supplement-3.pdf]

# Declaration of competing financial interests

JOURNAL: Nature Medicine

MANUSCRIPT NUMBER: A40647A

MANUSCRIPT TITLE: DCX Re-expression Reduces  
Subcortical Band Heterotopia

Please check one of the following:

1. I declare that the authors have no competing interests as defined by Nature Publishing Group, or other interests that might be perceived to influence the results and discussion reported in this paper.
2. The authors have competing interests as defined by Nature Publishing Group, or other interests that might be perceived to influence the results and discussion reported in this paper.
3. I decline to respond to this request for information.

If you have checked 2, please specify the competing interests:

---

---

---

---

---

---

---

---

SIGNATURE: 

NAME IN BLOCK CAPITALS: Joseph Lotusec

DATE: 10/22/08

The Nature journals' competing financial interests policy is defined, and further details of our procedures are explained, at:

[http://www.nature.com/authors/editorial\\_policies/competing.html](http://www.nature.com/authors/editorial_policies/competing.html)
